# Supplementary material for: Analysis of the Learning Process of Computer Programming Logic in an 8-Year-Old Elementary School Student at Home through the Scratch Program
Source: MDPI journal article supplement (doi:10.3390/digital4010002), 2023-12-25
Supplement: s1 [file s1]

## **SUPPORTING INFORMATION**

Analysis of the Learning Process of Computer Programming Logic in an 8-year-old Elementary School Student at Home through the Scratch Program

### **Educational Guide**

#### **1. Introduction to desktop PC**

**Objective:** Familiarize the student with the PC environment, develop basic handling skills, and promote comfort with the use of the mouse and keyboard.

#### **Activities**

- Mouse and Keyboard Handling
  - A) Practical exercises to improve the fine motor skills and coordination necessary for mouse and keyboard use.
  - B) Interactive games involving precise mouse movement and efficient keyboard utilization.
- Operating System Navigation
  - C) Introduction to the basic concepts of navigating the operating system (Windows).
  - D) Exercises for opening and closing programs, managing files, and folders.
- Keyboard Shortcuts
  - E) Presentation of useful keyboard shortcuts and their application in the programming environment.
  - F) Regular practice to incorporate keyboard shortcuts into the student's workflow.

#### **Visual and Multimedia Resources**

- I. Use of interactive tutorials and explanatory videos to make the introduction to the PC more accessible and visually appealing.
- II. Integration of educational games that reinforce the presented concepts.

## **2. Sessions on the Computer**

**Objective:** Provide students with direct experience in using the computer and the Scratch program, encouraging the practical application of learned concepts.

### **Activities**

- Exploration of Scratch
  - A) General presentation of the Scratch interface, available tools, and basic functions
  - B) Creation of simple projects to understand how programming blocks work.
- Mouse Coordination Exercises
  - C) Application of specific exercises in Scratch to improve motor coordination while dragging and dropping blocks.
- Initial Block Functionalities
  - D) Introduction to the concept of objects, the Scratch drawing palette to create custom objects, and basic movement using blocks.
- Creation of Basic Projects
  - E) Gradual development of more complex projects to apply and consolidate the acquired knowledge.

### **Interactive Resources**

Use of pre-existing interactive projects in Scratch to allow students to explore and learn from practical examples.

Immediate feedback and guidance during practical sessions to maximize understanding and retention of concepts.

## **3. Discovery Learning**

**Objective:** Promote the autonomy and capacity of the student to discover and understand new programming concepts through active exploration.

### **Activities**

- Free Exploration Projects
  - A) Assignment of open projects that allow students to creatively apply the programming blocks they have learned.
  - B) Encouragement of experimentation and independent problem-solving.
- Challenges and Puzzles
  - C) Presentation of challenges and puzzles related to programming in Scratch.
  - D) Encouragement of problem-solving through the application of previously learned concepts.
- Guided Research

- E) Encouragement to seek out other children's projects, research them, and share opinions online.
- Constructive Feedback
  - F) Regular evaluation of projects and challenges completed by the student.
  - G) Constructive feedback to drive continuous improvement and provide specific guidance on areas of development.

#### **4. Essential Mathematical Concepts**

**Objective:** Introduce essential mathematical concepts such as variables, spatial arrangement, and negative numbers.

##### **Activities**

- Coordinates in a Two-Dimensional Plane
  - A) Explanation of the coordinate system (x, y) and its application in Scratch.
  - B) Practical exercises on object positioning on the screen.
- Negative Numbers
  - C) Presentation of the concept of negative numbers based on spatial arrangement on coordinate axes and their relevance in programming.
  - D) Practical exercises to understand how negative numbers influence the movement of objects.
- Variables and Basic Operations
  - E) Introduction to the concept of variables and their function in programming.
  - F) Practical examples of how to use and modify variables in Scratch.
  - G) Basic operations (addition, subtraction, multiplication, division) with variables.
  - H) Concept of a counter.
  - I) Reinforcement of the object concept.

##### **Visual Resources**

Use of graphics and visual examples to facilitate the understanding of these mathematical concepts.

Creation of practical situations in Scratch that require the use of variables and basic operations.

#### **5. Initiation of the Star Wars-themed Shmups game project: guidance, monitoring, and personalized support**

**Objective:** The project is initiated, gradually applying the concepts learned in the previous sections. In this phase, personalized guidance is provided to address challenges and facilitate optimal progress in programming learning.

##### **Activities**

- Tutoring Sessions
  - A) Scheduling regular sessions with the tutor (parent) to review progress and address questions or difficulties.
  - B) Creating an open space for discussion and clarification of concepts.
- Adaptation of Approach
  - C) Continuous assessment of the student's learning style to adapt educational strategies as needed.
  - D) Identifying and addressing specific areas that require more attention or personalized focus.
- Progress Tracking
  - E) Maintaining a detailed record of the student's progress in terms of acquired skills and completed projects.
  - F) Using data to adjust teaching strategies and ensure consistent development.

## **6. Continuation of the ShuWars project, more advanced programming concepts**

**Objective:** Strengthen and apply advanced programming concepts in more complex projects.

### **Activities**

- Creation of Personal Projects
  - A) Encouragement of creativity by assigning a new functionality not considered in the game.
  - B) Integration of learned elements to develop unique and meaningful projects.
- Presentation and Teaching
  - C) Encouragement for the student to present and explain their projects to other children or family members.
  - D) Development of communication skills and consolidation of learning through teaching others.

## **7. Evaluation and Feedback**

**Objective:** Assess student progress and provide constructive feedback for continuous development.

### **Activities**

- Periodic Reviews

- A) Conducting periodic reviews of the student's work, assessing the implementation of learned concepts.
- B) Providing detailed feedback on positive aspects and areas for improvement.
- Individual Projects
  - C) Assigning individual projects to evaluate the student's ability to apply concepts independently.
  - D) Evaluating creativity, problem-solving, and technical implementation.
- Self-assessment
  - E) Encouraging self-assessment, where the student reflects on their own progress and sets goals for the future.
  - F) Developing metacognitive skills for autonomous learning.

## **8. Demonstration and Teaching to Others**

**Objective:** Reinforce learning by teaching what has been learned to others, consolidating knowledge.

### **Activities**

- Creation of Educational Videos
  - A) Encouraging the student to create educational videos explaining programming concepts to a wider audience.
  - B) Development of communication skills and information synthesis.
- Teaching Sessions
  - C) Organizing sessions where the student has the opportunity to teach other children what they have learned.
  - D) Strengthening understanding by explaining concepts to their peers.

## **9. Documentation and Portfolio Creation**

**Objective:** Encourage the documentation of the learning process and the creation of a digital portfolio.

### **Activities**

- Continuous Recording
  - A) Encouraging the student to maintain a continuous record of their activities, overcome challenges, and achievements.
  - B) Using learning journals or blogs to document reflections and lessons learned.
- Creation of a Digital Portfolio

- C) Guiding the student in creating a digital portfolio that highlights their projects, skills, and progress, restricted to a closed environment without public exposure.
- D) Including screenshots, videos, and project descriptions.

# Performance Evaluation Questionnaire

## **I. Mouse and Keyboard Handling**

### ***A. How would you assess the student's mouse skills?***

- 1 The student shows little or no proficiency with the mouse, experiencing difficulties in simple tasks.
- 2 The student demonstrates basic skills but often makes errors and may be slow.
- 3 The student has moderate mouse proficiency, performing tasks accurately and at a moderate pace.
- 4 The student is skilled with the mouse, performing tasks accurately and efficiently.
- 5 The student has excellent mouse control, performing tasks precisely and efficiently, even in complex situations.

### ***B. How would you assess fine motor coordination when using the keyboard?***

- 1 The student has difficulty using the keyboard in a coordinated manner.
- 2 The student shows basic skills but often makes errors when using the keyboard.
- 3 The student has average fine motor coordination when using the keyboard, with few errors.
- 4 The student demonstrates good fine motor coordination when using the keyboard, with precision.
- 5 The student has excellent fine motor coordination, using the keyboard precisely and efficiently.

## **II. Operating System Navigation (Windows)**

### ***A. How well does the student understand basic navigation concepts?***

- 1 The student struggles to understand basic navigation concepts in Windows.
- 2 The student grasps some concepts but is often confused.
- 3 The student has a moderate understanding of basic navigation concepts in Windows.
- 4 The student understands basic concepts well and navigates efficiently.
- 5 The student has exceptional knowledge of basic navigation concepts in Windows.

### ***B. How would you rate the student's ability to open and close programs, manage files, and folders?***

- 1 The student has difficulty performing basic file and program management tasks.
- 2 The student can perform some tasks but often makes mistakes.
- 3 The student has average skills in managing files and programs in Windows.
- 4 The student is able to perform file and program management tasks accurately and efficiently.
- 5 The student has excellent ability to open and close programs, manage files, and folders efficiently.

### **III. Keyboard Shortcuts**

#### ***A. To what extent has the student incorporated keyboard shortcuts into their workflow?***

- 1 The student rarely uses keyboard shortcuts in their workflow.
- 2 The student occasionally uses some keyboard shortcuts.
- 3 The student regularly incorporates keyboard shortcuts into their workflow.
- 4 The student consistently uses keyboard shortcuts efficiently.
- 5 The student has exceptional mastery of keyboard shortcuts and uses them expertly in their workflow.

#### ***B. How quickly does the student apply useful keyboard shortcuts in the programming environment?***

- 1 The student applies keyboard shortcuts very slowly or with frequent errors.
- 2 The student applies keyboard shortcuts at a basic level but at a slow pace.
- 3 The student has an average speed when applying keyboard shortcuts in programming.
- 4 The student applies keyboard shortcuts quickly and accurately.
- 5 The student has exceptional speed when applying keyboard shortcuts in programming.

### **IV. Scratch Exploration and Project Creation**

#### ***A. How would you assess the student's understanding of the Scratch interface and basic functions?***

- 1 The student has difficulty understanding the Scratch interface and uses few basic functions.
- 2 The student demonstrates a basic understanding of the interface but often gets confused with simple functions.
- 3 The student has a moderate understanding of the Scratch interface and uses basic functions accurately.
- 4 The student understands the Scratch interface well and uses basic functions efficiently.
- 5 The student has exceptional knowledge of the interface and uses basic functions expertly.

#### ***B. How capable is the student of creating simple projects and understanding how programming blocks work?***

- 1 The student struggles to create simple projects and understand how blocks work.
- 2 The student can create simple projects but often has difficulty fully understanding the blocks.
- 3 The student is able to create simple projects and understands the functionality of most blocks used.
- 4 The student easily creates simple projects and has a solid understanding of programming blocks.
- 5 The student expertly creates simple projects and demonstrates a deep understanding of the blocks used.



## **V. Coordination and Initial Functionality with Blocks**

### ***A. How skilled is the student at coordinating the mouse in Scratch?***

- 1 The student struggles to coordinate the mouse in Scratch, negatively affecting project creation.
- 2 The student demonstrates basic mouse coordination but often makes errors when performing actions in Scratch.
- 3 The student has moderate mouse coordination in Scratch, performing actions accurately in most cases.
- 4 The student coordinates the mouse skillfully in Scratch, with few errors when performing actions.
- 5 The student has exceptional mouse coordination in Scratch, performing actions with precision and efficiency.

### ***B. How would you rate the student's understanding of the concept of objects and the creation of basic movements with blocks?***

- 1 The student struggles to understand the concept of objects and create basic movements with blocks.
- 2 The student shows a basic understanding of objects but often has difficulties with simple movements.
- 3 The student has a moderate understanding of objects and can create basic movements with blocks.
- 4 The student understands the concept of objects well and creates basic movements with ease.
- 5 The student has exceptional knowledge of objects and expertly creates basic movements with blocks.

## **VI. Creation of Basic Projects and Gradual Development**

### ***A. To what extent has the student progressed in creating more complex projects in Scratch?***

- 1 The student struggles to progress beyond basic projects in Scratch
- 2 The student progresses slowly in creating more complex projects, with limited advancement.
- 3 The student shows moderate progression in creating more complex projects in Scratch.
- 4 The student progresses efficiently in more complex projects in Scratch.
- 5 The student has exceptional progression and creates complex projects in Scratch with mastery.

### ***B. How well does the student apply and consolidate acquired knowledge in larger-scale projects?***

- 1 The student has difficulty applying and consolidating knowledge in larger-scale projects.
- 2 The student demonstrates some application of knowledge but with limited consolidation in larger projects.
- 3 The student applies and consolidates knowledge to a moderate extent in larger-scale projects.
- 4 The student applies and consolidates knowledge efficiently in larger projects.
- 5 The student applies and consolidates knowledge exceptionally in large-scale projects in Scratch.

## **VII. Application of Essential Mathematical Concepts**

### ***A. How would you assess the student's ability to apply coordinates in a two-dimensional plane?***

- 1 The student has difficulty applying coordinates in a two-dimensional plane.
- 2 The student demonstrates a basic understanding of coordinates but often makes errors.
- 3 The student has a moderate ability to apply coordinates in a two-dimensional plane.
- 4 The student applies coordinates accurately and efficiently.
- 5 The student has exceptional skill in applying coordinates in complex Scratch projects.

### ***B. How well does the student apply and consolidate acquired knowledge in larger-scale projects?***

- 1 The student struggles to understand and apply variables and basic operations in Scratch projects.
- 2 The student shows basic understanding but often makes errors in applying variables and mathematical operations.
- 3 The student has a moderate understanding and applies variables and basic operations accurately in Scratch projects.
- 4 The student understands well and efficiently applies variables, basic operations, and mathematical concepts in Scratch.
- 5 The student has exceptional knowledge and expertly applies variables, basic operations, and mathematical concepts in advanced Scratch projects.

## **VIII. Participation in Tutoring Sessions and Adaptation of Approach**

### ***A. How would you rate the student's participation in tutoring sessions?***

- 1 The student participates little or not at all in tutoring sessions.
- 2 The student participates limitedly in tutoring sessions.
- 3 The student has average participation in tutoring sessions.
- 4 The student actively participates and contributes significantly in tutoring sessions.
- 5 The student leads and facilitates tutoring sessions, demonstrating exceptional commitment.

### ***B. How well does the student adapt to different educational approaches based on their learning style?***

- 1 The student struggles to adapt to different educational approaches.
- 2 The student shows some adaptation but with limitations in different educational approaches.
- 3 The student moderately adapts to different educational approaches based on their learning style.
- 4 The student adapts well to different educational approaches, showing flexibility.
- 5 The student adapts exceptionally to different educational approaches, demonstrating high flexibility.

## **IX. Creativity in Personal Projects and Teaching Skills**

### ***A. How creative and original are the student's personal projects?***

- 1 The student's personal projects lack creativity and originality.
- 2 Personal projects show some creativity but are mostly conventional.
- 3 The student's personal projects are creative and original to some extent.
- 4 Personal projects demonstrate creativity and originality.
- 5 The student's personal projects are exceptionally creative and original.

### ***B. How would you assess the student's communication and teaching skills during presentations to other children or family members?***

- 1 The student has difficulty communicating and teaching during presentations.
- 2 The student shows some communication skills but is often unclear.
- 3 The student has average communication and teaching skills during presentations.
- 4 The student communicates and teaches clearly and effectively during presentations.
- 5 The student has exceptional communication and teaching skills, captivating and conveying information exceptionally well.

## **X. Self-Evaluation and Documentation in the Portfolio**

### ***A. How reflective is the student in their self-evaluation?***

- 1 The student has little reflection in their self-evaluation.
- 2 The student shows some reflection, but it is limited in self-evaluation.
- 3 The student has average reflection in their self-evaluation.
- 4 The student reflects effectively in their self-evaluation.
- 5 The student has exceptionally reflective and deep self-evaluation.

### ***B. How would you rate the quality and thoroughness of documentation in the digital portfolio?***

- 1 Documentation in the portfolio is sparse and of low quality.
- 2 Documentation in the portfolio is limited in quality and thoroughness.
- 3 Documentation in the portfolio is of average quality and has some thoroughness.
- 4 Documentation in the portfolio is of high quality and fairly thorough.
- 5 Documentation in the portfolio is exceptional in quality and completely thorough.

## **Perception Evaluation**

1. How much do you enjoy learning to do new things in Scratch?
2. Do you feel confident when using the mouse and keyboard on the computer, or do you have any doubts or difficulties?
3. What part of learning to program do you find the most fun?
4. How do you feel when you finish a project in Scratch?
5. Do you like sharing your projects with other children, and how does it make you feel?
6. Do you ever feel a little confused or frustrated when programming?
7. Do you enjoy discovering new things by yourself, or do you prefer someone to explain them to you?
8. Do you think you have learned important things while programming in Scratch?
9. Are you looking forward to learning more fun things in the upcoming lessons?
10. How do you feel when you make a mistake while programming?
